# Supplementary material for: Identification of Minimal Clinically Important Difference Scores of the PedsQL in Children, Adolescents, and Young Adults With Type 1 and Type 2 Diabetes
Source: Oxford University Press journal article supplement (doi:10.2337/dc12-1708), 2013-01-23
Supplement: dc121708supplementarydata.pdf [file dc121708supplementarydata.pdf]

## SUPPLEMENTARY DATA

The writing group for this manuscript acknowledges the contributions of the following individuals to the SEARCH for Diabetes in Youth Study:

**California:** Jean M. Lawrence, ScD, MPH, MSSA, Kristi Reynolds, PhD, MPH, Jin-Wen Hsu, PhD, Mary Helen Black, PhD, Kim Holmquist, BA, and Harpreet S. Takhar, MPH, for the Department of Research & Evaluation and Ann K. Kershner, MD for the Department of Pediatrics, Kaiser Permanente Southern California; and David J. Pettitt, MD, for the Sansum Diabetes Research Institute.

**Colorado:** Dana Dabelea, MD, PhD, Richard F. Hamman, MD, DrPH, Lisa Testaverde, MS, for the Department of Epidemiology, Colorado School of Public Health, University of Colorado Denver, Georgeanna J. Klingensmith, MD, Marian J. Rewers, MD, PhD, David Maahs, MD and Paul Wadwa, MD for the Barbara Davis Center for Childhood Diabetes, Stephen Daniels, MD, PhD, Kristen Nadeau, MD, Department of Pediatrics and Children's Hospital, Clifford A. Bloch, MD, for the Pediatric Endocrine Associates, Carmelita Sorrelman, MSPH, Alfreda Beartrack, MSPH for the Navajo Area Indian Health Prevention Program.

**Hawaii:** Beatriz L. Rodriguez, MD, PhD, Wilfred Fujimoto, MD, J. David Curb, MD (deceased), Fiona Kennedy, RN, Greg Uramoto, MD, Sorrell Waxman, MD, , and Richard Chung, MD, for Kuakini Medical Center; Beth Waitzfelder, PhD, for the Center for Health Research, Kaiser Permanente Hawaii; and Teresa Hillier, MD for the Center for Health Research, Kaiser Permanente Northwest and Hawaii.

**Ohio:** Lawrence M. Dolan, MD, Michael Seid, PhD, Elaine Urbina, MD, MS, Debra A. Standiford, MSN, CNP for the Cincinnati Children's Hospital Medical Center.

**Carolina:** Elizabeth J. Mayer-Davis, PhD, Joan Thomas MS, RD for the University of North Carolina, Chapel Hill, Anwar Merchant, ScD, Angela D. Liese, PhD, MPH, , Robert R. Moran, PhD, Gladys Gaillard-McBride, RN, CFNP, Deborah Lawler, MT (ASCP), Malaka Jackson, MD for the University of South Carolina, Deborah Bowlby, MD, for the Medical University of South Carolina, James Amrhein, MD, for Greenville Hospital Systems, Pam Clark, MD for McLeod Pediatric Subspecialists, Mark Parker, MD for Pediatric Endocrinology & Diabetes Specialists, Charlotte, NC.

**Washington:** Catherine Pihoker, MD, Maryam Afkarian, MD, Angela Badaru, MD, Lisa Gilliam, MD, PhD, Irl Hirsch, MD, Lenna L. Liu, MD, MPH, John Neff, MD, and Joyce Yi-Frazier, PhD for the University of Washington, Beth Loots, MPH, MSW, Rebecca O'Connor, RN, Sue Kearns, RN, Mary Klingsheim, RN, Emil Buscaino, BS, Katherine Cochrane, BS, Onel Martinez, MS, and Sharla Semana, BS, for Seattle Children's Hospital, and Carla Greenbaum, MD for Benaroya Research Institute.

**Centers for Disease Control and Prevention:** Giuseppina Imperatore, MD, PhD, Desmond E. Williams, MD, PhD, Henry S. Kahn, MD, Bernice Moore, MBA, Gregg W. Edward, PhD, Sharon H. Saydah, PhD.

**National Institute of Diabetes and Digestive and Kidney Diseases: NIH:** Barbara Linder, MD, PhD.

## SUPPLEMENTARY DATA

**Central Laboratory:** Santica M. Marcovina, PhD, ScD, Vinod P. Gaur, PhD, and Jessica Harting for the University of Washington Northwest Lipid Research Laboratories.

**Coordinating Center:** Ronny Bell, PhD, MS, Ralph D'Agostino, Jr., PhD, Bettina Beech, DrPH, Douglas Case, PhD, Jasmin Divers, PhD, Timothy Morgan, PhD, Michelle Naughton, PhD, Leora Henkin, MPH, MEd, Susan Moxley, BS, Gena Hargis, MPH, Donna Kronner, Maureen T. Goldstein, BA, Andrea Anderson, MS, Jeanette Andrews, MS, Abigail Lauer, MS, Jennifer Talton, MS for Wake Forest School of Medicine.
